# Supplementary material for: N. sphaeroides phycocyanin subunit Ns-α and Ns-β improve C. elegans antioxidative capacity via ROS-related regulation
Source: PeerJ journal article supplement (doi:10.7717/peerj.18917), 2025-02-10
Supplement: MIQE.xlsx [file MIQE.xlsx]

## Sheet: MIQE
	Item to check	Page Number or lines in the manuscript or other references		Item to check	Page Number or lines in the manuscript or other references
	Experimental design			qPCR oligonucleotides
	Definition of experimental and control groups	Line 238-240		Primer sequences	line 259
	Number within each group	Line 251-253		RTPrimerDB identification number	/
	Assay carried out by the core or investigator’s laboratory	Line 250		Probe sequences	according to the kit
	Acknowledgment of authors’ contributions	/		Location and identity of any modifications	line 259
	Sample			Manufacturer of oligonucleotides	/
	Description	Line 238-240		Purification method	ePAGE
	Volume/mass of sample processed	Line 245		qPCR protocol
	Microdissection or macrodissection	/		Complete reaction conditions	Line 253
	Processing procedure	Line 250-253		Reaction volume and amount of cDNA/DNA	Line 247
	If frozen, how and how quickly?	Line 241-243		Primer, (probe), Mg2 2 , and dNTP concentrations	according to the kit
	If fixed, with what and how quickly?	Line 246		Polymerase identity and concentration	according to the kit
	Sample storage conditions and duration (especially for FFPEb samples)	/		Buffer/kit identity and manufacturer	according to the kit
	Nucleic acid extraction			Exact chemical composition of the buffer	/
	Procedure and/or instrumentation	line 248-251		Additives (SYBR Green I, DMSO, and so forth)	Line 251
	Name of kit and details of any modifications	Line 244-250		Manufacturer of plates/tubes and catalog number	/
	Source of additional reagents used	Line 242		Complete thermocycling parameters	Line 253
	Details of DNase or RNase treatment	Line 244		Reaction setup (manual/robotic)	/
	Contamination assessment (DNA or RNA)	Line 244		Manufacturer of qPCR instrument	Line 251-252
	Nucleic acid quantification	Line 244		qPCR validation
	Instrument and method	Line 250-251		Evidence of optimization (from gradients)	/
	Purity (A260/A280)	/		Specificity (gel, sequence, melt, or digest)	line 249
	Yield	/		For SYBR Green I, Cq of the NTC	yes
	RNA integrity: method/instrument	Line243		Calibration curves with slope and y intercept	yes
	RIN/RQI or Cq of 3 and 5 transcripts	/		PCR efficiency calculated from slope	yes
	Electrophoresis traces	Line243;Line 249		CIs for PCR efficiency or SE	/
	Inhibition testing (Cq dilutions, spike, or other)	/		r2of calibration curve	yes
	Reverse transcription			Linear dynamic range	yes
	Complete reaction conditions	Line 252-253		Cq variation at LOD	yes
	Amount of RNA and reaction volume	Line 244, 247		CIs throughout range	/
	Priming oligonucleotide (if using GSP) and concentration	line 257		Evidence for LOD	yes
	Reverse transcriptase and concentration	Line 245-246		If multiplex, efficiency and LOD of each assay	yes
	Temperature and time	Line 252-253		Data analysis
	Manufacturer of reagents and catalogue numbers	Line 251		qPCR analysis program (source, version)	Line251-252
	Cqs with and without reverse transcription	/		Method of Cq determination	yes
	Storage conditions of cDNA	Line 249		Outlier identification and disposition	yes
	qPCR target information			Results for NTCs	yes
	Gene symbol	line 258		Justification of number and choice of reference genes	Line249
	Sequence accession number	line 265		Description of normalization method	Line257
	Location of amplicon	/		Number and concordance of biological replicates	Line255
	Amplicon length	line 254		Number and stage (reverse transcription or qPCR) of technical replicates	Line255
	In silico specificity screen (BLAST, and so on)	line 258		Repeatability (intraassay variation)	Line255
	Pseudogenes, retropseudogenes, or other homologs?	/		Reproducibility (interassay variation, CV)	/
	Sequence alignment	/		Power analysis	/
	Secondary structure analysis of amplicon	/		Statistical methods for results significance	Line 269
	Location of each primer by exon or intron (if applicable)	line 258		Software (source, version)	Line 269
	What splice variants are targeted?	line 258		Cq or raw data submission with RDML	/
