# Supplementary material for: N. sphaeroides phycocyanin subunit Ns-α and Ns-β improve C. elegans antioxidative capacity via ROS-related regulation
Source: PeerJ journal article supplement (doi:10.7717/peerj.18917), 2025-02-10
Supplement: Raw_data.zip [file Raw_data.zip]

## Sheet: Gene expression 
		Genes	Ttreatment	2-△△ct	Error		Sig
		SOD-3	Control	1.0006	0.04097
			Ns-α	0.3641	0.0226		**
			Ns-β	0.5211	0.05195		*
		DAF-16	Control	1.01375	0.19975
			Ns-α	0.471512	0.03928		*
			Ns-β	0.363516	0.03993		**
		SKN-1	Control	1.0019	0.07696
			Ns-α	2.7699	0.08589		**
			Ns-β	1.6043	0.1041		**
		CAT-1	Control	1.0031	0.09616
			Ns-α	0.4573	0.03831		**
			Ns-β	0.404	0.01921		**
		CTL-1	Control	1.009	0.16094
			Ns-α	0.8142	0.03264
			Ns-β	0.767	0.12448
		DAF-2	Control	1.00542	0.12779
			Ns-α	0.169141	0.02901		**
			Ns-β	0.805971	0.18131
