# Supplementary material for: N. sphaeroides phycocyanin subunit Ns-α and Ns-β improve C. elegans antioxidative capacity via ROS-related regulation
Source: PeerJ journal article supplement (doi:10.7717/peerj.18917), 2025-02-10
Supplement: Tabel_S1.docx [file Tabel_S1.docx]

**Tabel S1.** The basic properties of two subunit proteins Ns-α and Ns-β

| **Protein** | **CDS(bp)** | **aa.** | **Helixes** | **ProbityScore** |
| --- | --- | --- | --- | --- |
| Ns-α | 492 | 163 | 7 | 0.99 |
| Ns-β | 522 | 173 | 7 | 1.10 |
