# Supplementary material for: N. sphaeroides phycocyanin subunit Ns-α and Ns-β improve C. elegans antioxidative capacity via ROS-related regulation
Source: PeerJ journal article supplement (doi:10.7717/peerj.18917), 2025-02-10
Supplement: TabelS2.xlsx [file TabelS2.xlsx]

## Sheet: Sheet1
Table S2 Primers used in the study
	Gene name	Primer Sequence(5’to3’)
	Ce-Actin	qF：GATGTCGCCGAGGAGAAGCAAC
		qR：ACTGGGGTAGAGTGGAGCTTGG
	Ce-DAF-2	qF：TGAAAGCGAAGCAGCGAGAAGG
		qR：CGTCCGAACTTCCGCATCACTC
	Ce-DAF-16	qF：CGGGAGAGAGGGACACGCTTC
		qR：ACGGAATTGCTCAGCCACCATG
	Ce-SOD-3	qF：CATTGTTTCAGCGCGACTTCGG
		qR：TCCCCAGCCAGAGCCTTGAAC
	Ce-CTL-1	qF：AGCGTGTCGTTCATGCCAAGG
		qR：CCGATTCTCCAGCGACCGTTG
	Ce-CAT-1	qF：AGGGGCAAGGCGACGAGTG
		qR：GCGAGAACCCTTCCCAGTAT
	Ce-SKN-1	qF：GCCAGCGGACAACGGAAGC
		qR：GGAACGCCGACACTGGAAGC
